# Supplementary material
Source: PubMed Central journal article supplement (PMC4734563)
Supplement: supp_pp.15.01430_PP2015-01430R1_Supplemental_Material.pdf [file supp_pp.15.01430_PP2015-01430R1_Supplemental_Material.pdf]

## Supplemental Data

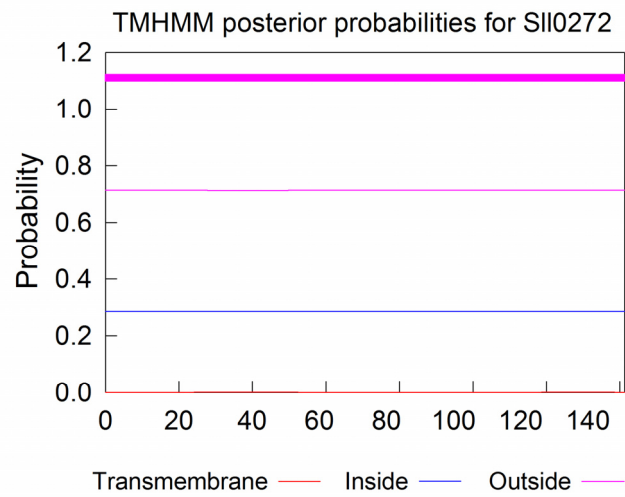

**Supplemental Figure S1.** Prediction of transmembrane region for SII0272. The translated amino acid sequence of SII0272 was used to predict transmembrane region with TMHMM (<http://www.cbs.dtu.dk/services/TMHMM/>). The pink bar indicates that SII0272 does not contain any transmembrane region.



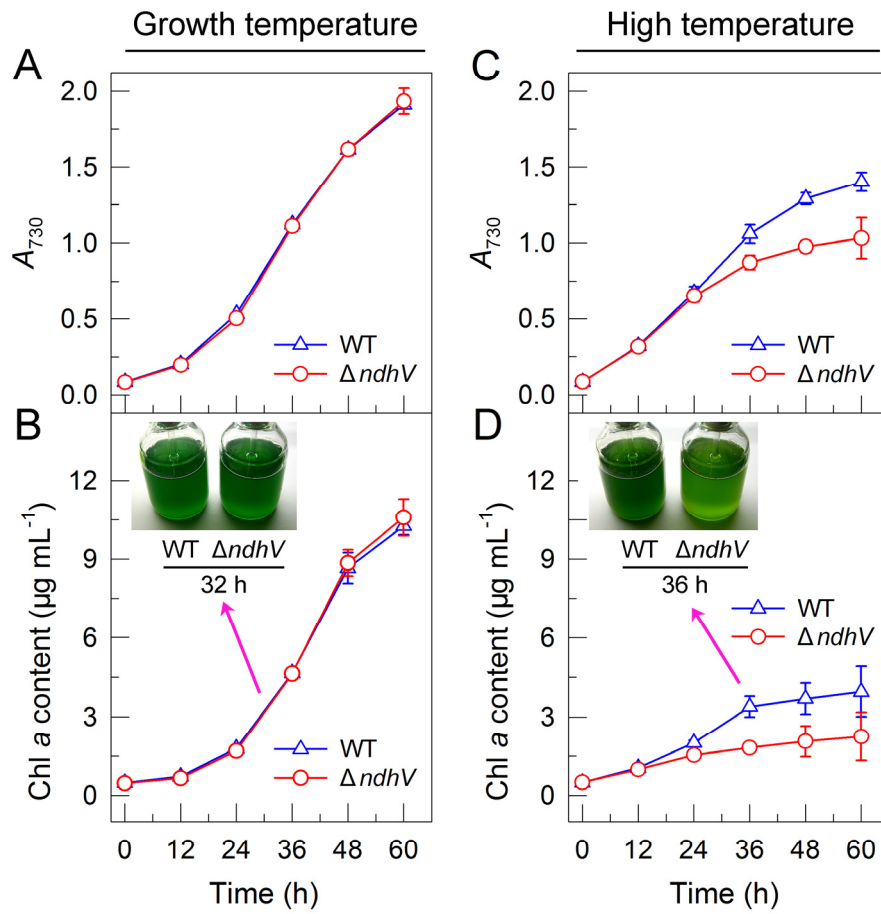

**Supplemental Figure S3.** Growth of WT and  $\Delta ndhV$  cells under different temperature conditions. Cell density (A) and Chl *a* content (B) were monitored under growth temperature (30°C). Cell density (C) and Chl *a* content (D) were monitored under high temperature (42°C). Values are means  $\pm$  SD ( $n = 5$ ).

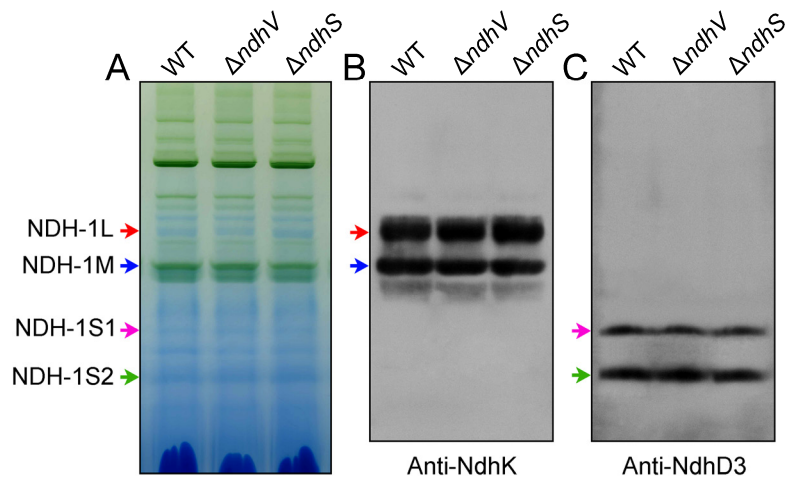

**Supplemental Figure S4.** Western analyses of NDH-1 complexes from the air-grown WT,  $\Delta ndhV$  and  $\Delta ndhS$  cells. A, Thylakoid protein complexes isolated from the air-grown WT,  $\Delta ndhV$  and  $\Delta ndhS$  cells were separated by BN-PAGE. Thylakoid membrane extract corresponding to 7  $\mu\text{g}$  Chl *a* was loaded onto each lane. Red, blue, pink and green arrows indicate the positions of NDH-1L, NDH-1M, NDH-1S1 and NDH-1S2 complexes, respectively. B and C, Protein complexes were electroblotted to a polyvinylidene difluoride membrane, and the membrane was cross-reacted with anti-NdhK and NdhD3 to probe the assembly of NDH-1 complexes.

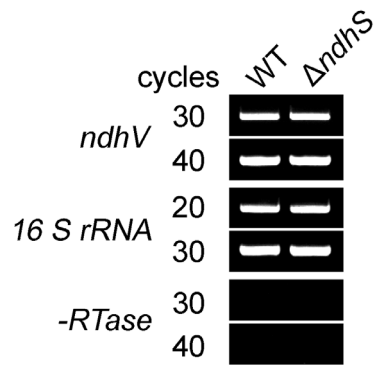

**Supplemental Figure S5.** RT-PCR analysis of *ndhV* in the WT and  $\Delta ndhS$  strains. The transcript level of *16 S rRNA* in each sample is shown as a control. The absence of contamination of DNA was confirmed by PCR without reverse transcriptase.

**Supplemental Table S1.** Primers used in this study.

Primers used for identifying the sites of transposon insertion.

| Name           | Primer sequence (5'–3')   | Purpose                                    |
|----------------|---------------------------|--------------------------------------------|
| Transprimer-FP | ACCTACAACAAAGCTCTCATCAACC | Identifying the transposon insertion sites |
| Transprimer-RP | GCAATGTAACATCAGAGATTTTGAG |                                            |

Primers used to construct the *pEASY-Blunt Zero-ΔndhV* vector.

| Name           | Primer sequence (5'–3')    | Purpose                                                      |
|----------------|----------------------------|--------------------------------------------------------------|
| <i>ndhV</i> -A | GAGCAGATAAAGCAAGGGATAAATG  | Amplification of <i>ndhV</i> gene and its flanking sequences |
| <i>ndhV</i> -B | CAGAGTAAGAACAATAAGCACG     |                                                              |
| <i>ndhV</i> -C | CGGAATTCAAATAAAAAAGGGG     | Amplification of spectinomycin gene                          |
| <i>ndhV</i> -D | GCTCTAGAAAAATAAAAAAGGGGACC |                                                              |
| <i>ndhV</i> -E | GAGCAGATAAAGCAAGGGATAAATG  | Segregation analysis                                         |
| <i>ndhV</i> -F | CAGAGTAAGAACAATAAGCACG     |                                                              |

Primers used to construct vectors to express NdhV protein to raise antibody.

| Name            | Primer sequence (5'–3')   | Purpose       |
|-----------------|---------------------------|---------------|
| <i>ndhV</i> -FP | CGGGATCCATGACAGAAGCCAAAGC | NdhV antibody |
| <i>ndhV</i> -RP | CGAGCTCTTAGTTGCCCCCTAGCC  |               |

Primers used to construct the yeast two-hybrid vector.

| Name            | Primer sequence (5'–3')         | Purpose   |
|-----------------|---------------------------------|-----------|
| <i>ndhV</i> -FP | CCTCGAGATGACAGAAGCCAAAGCC       | NdhV bait |
| <i>ndhV</i> -RP | CCTCGAGTTAGTTGCCCCCTAGCCA       |           |
| <i>ndhO</i> -FP | CGGAATTCATGGCCGCTAAAATGAAAAAGG  | NdhO bait |
| <i>ndhO</i> -RP | CCCCTCGAGCTAAGCCAGGGCTTCGATTTGG |           |

|                 |                                   |           |
|-----------------|-----------------------------------|-----------|
| <i>ndhS</i> -FP | CGGAATTCATGATTTTTCCCGG            | NdhS prey |
| <i>ndhS</i> -RP | CCCTCGAGCTAGATGGGTTTACTG          |           |
| <i>ndhI</i> -FP | CCCCTCGAGATGTTTAACAACATTCTCAAACAG | NdhI prey |
| <i>ndhI</i> -RP | CCCCTCGAGCTATTCTGCTTTCACCAAATCTTC |           |
| <i>ndhB</i> -FP | CCCCTCGAGATGGACTTTTCTAGTAACGTTGCA | NdhB prey |
| <i>ndhB</i> -RP | CCCCTCGAGCTAGGGTAAATCATGGGAAATGGC |           |

Primers used to construct the fusion protein expression vector.

| Name           | Primer sequence (5'–3')   | Purpose                         |
|----------------|---------------------------|---------------------------------|
| <i>ndhV</i> -A | CGGGATCCATGACAGAAGCCAAAGC | Purifying NdhV<br>using His-tag |
| <i>ndhV</i> -B | CGAGCTCTTAGTTGCCCCCTAGCC  |                                 |
| <i>ndhV</i> -C | CCTCGAGATGACAGAAGCCAAAGCC | Purifying NdhV<br>using GST-tag |
| <i>ndhV</i> -D | CCTCGAGTTAGTTGCCCCCTAGCCA |                                 |
| <i>ndhS</i> -A | CGGGATCCATGATTTTTCCCGG    | Purifying NdhS<br>using His-tag |
| <i>ndhS</i> -B | CGGAATTCCTAGATGGGTTTACTG  |                                 |
| <i>ndhS</i> -C | CGGAATTCATGATTTTTCCCGG    | Purifying NdhS<br>using GST-tag |
| <i>ndhS</i> -D | CCCTCGAGCTAGATGGGTTTACTG  |                                 |

Primers used for RT-PCR.

| Name                 | Primer sequence (5'–3')   | Purpose                        |
|----------------------|---------------------------|--------------------------------|
| <i>ndhV</i> -FP      | CGCAGTGGAAGAGAAGCCCTTCACC | <i>ndhV</i> transcript         |
| <i>ndhV</i> -RP      | GTTGCAGGGTGTAGAGCACCATCAG |                                |
| <i>16 S rRNA</i> -FP | CGACTGCTAATACCCAATGTGC    | <i>16 S rRNA</i><br>transcript |
| <i>16 S rRNA</i> -RP | GTCCCTCAGTGTGAGTTTCAGC    |                                |
